# Supplementary material for: Impaired lysosomal acidification triggers iron deficiency and inflammation in vivo
Source: eLife journal article supplement (doi:10.7554/elife.51031), 2019-12-03
Supplement: supp [file elife-51031-supp-v1.zip]

Archive with 13 entries (13 files):
- elife_poa_e51031_Transparent_Reporting_File.pdf
- elife_poa_e51031_Supplementary_file_3.xls
- elife_poa_e51031_Figure_2_figure_supplement_1.pdf
- elife_poa_e51031_Figure_7_figure_supplement_1.pdf
- elife_poa_e51031_Figure_3_figure_supplement_2.pdf
- elife_poa_e51031_Figure_3_figure_supplement_1.pdf
- elife_poa_e51031_Supplementary_file_4.docx
- elife_poa_e51031_Supplementary_file_1.xls
- elife_poa_e51031_Figure_4_figure_supplement_1.pdf
- elife_poa_e51031_Supplementary_file_6.docx
- elife_poa_e51031_Supplementary_file_2.xls
- elife_poa_e51031_Supplementary_file_5.docx
- elife_poa_e51031_Figure_5_figure_supplement_1.pdf
