# Supplementary figures and images for: Impaired lysosomal acidification triggers iron deficiency and inflammation in vivo
Source: eLife journal article supplement (doi:10.7554/elife.51031), 2019-12-03

Figure 2 - figure supplement 1

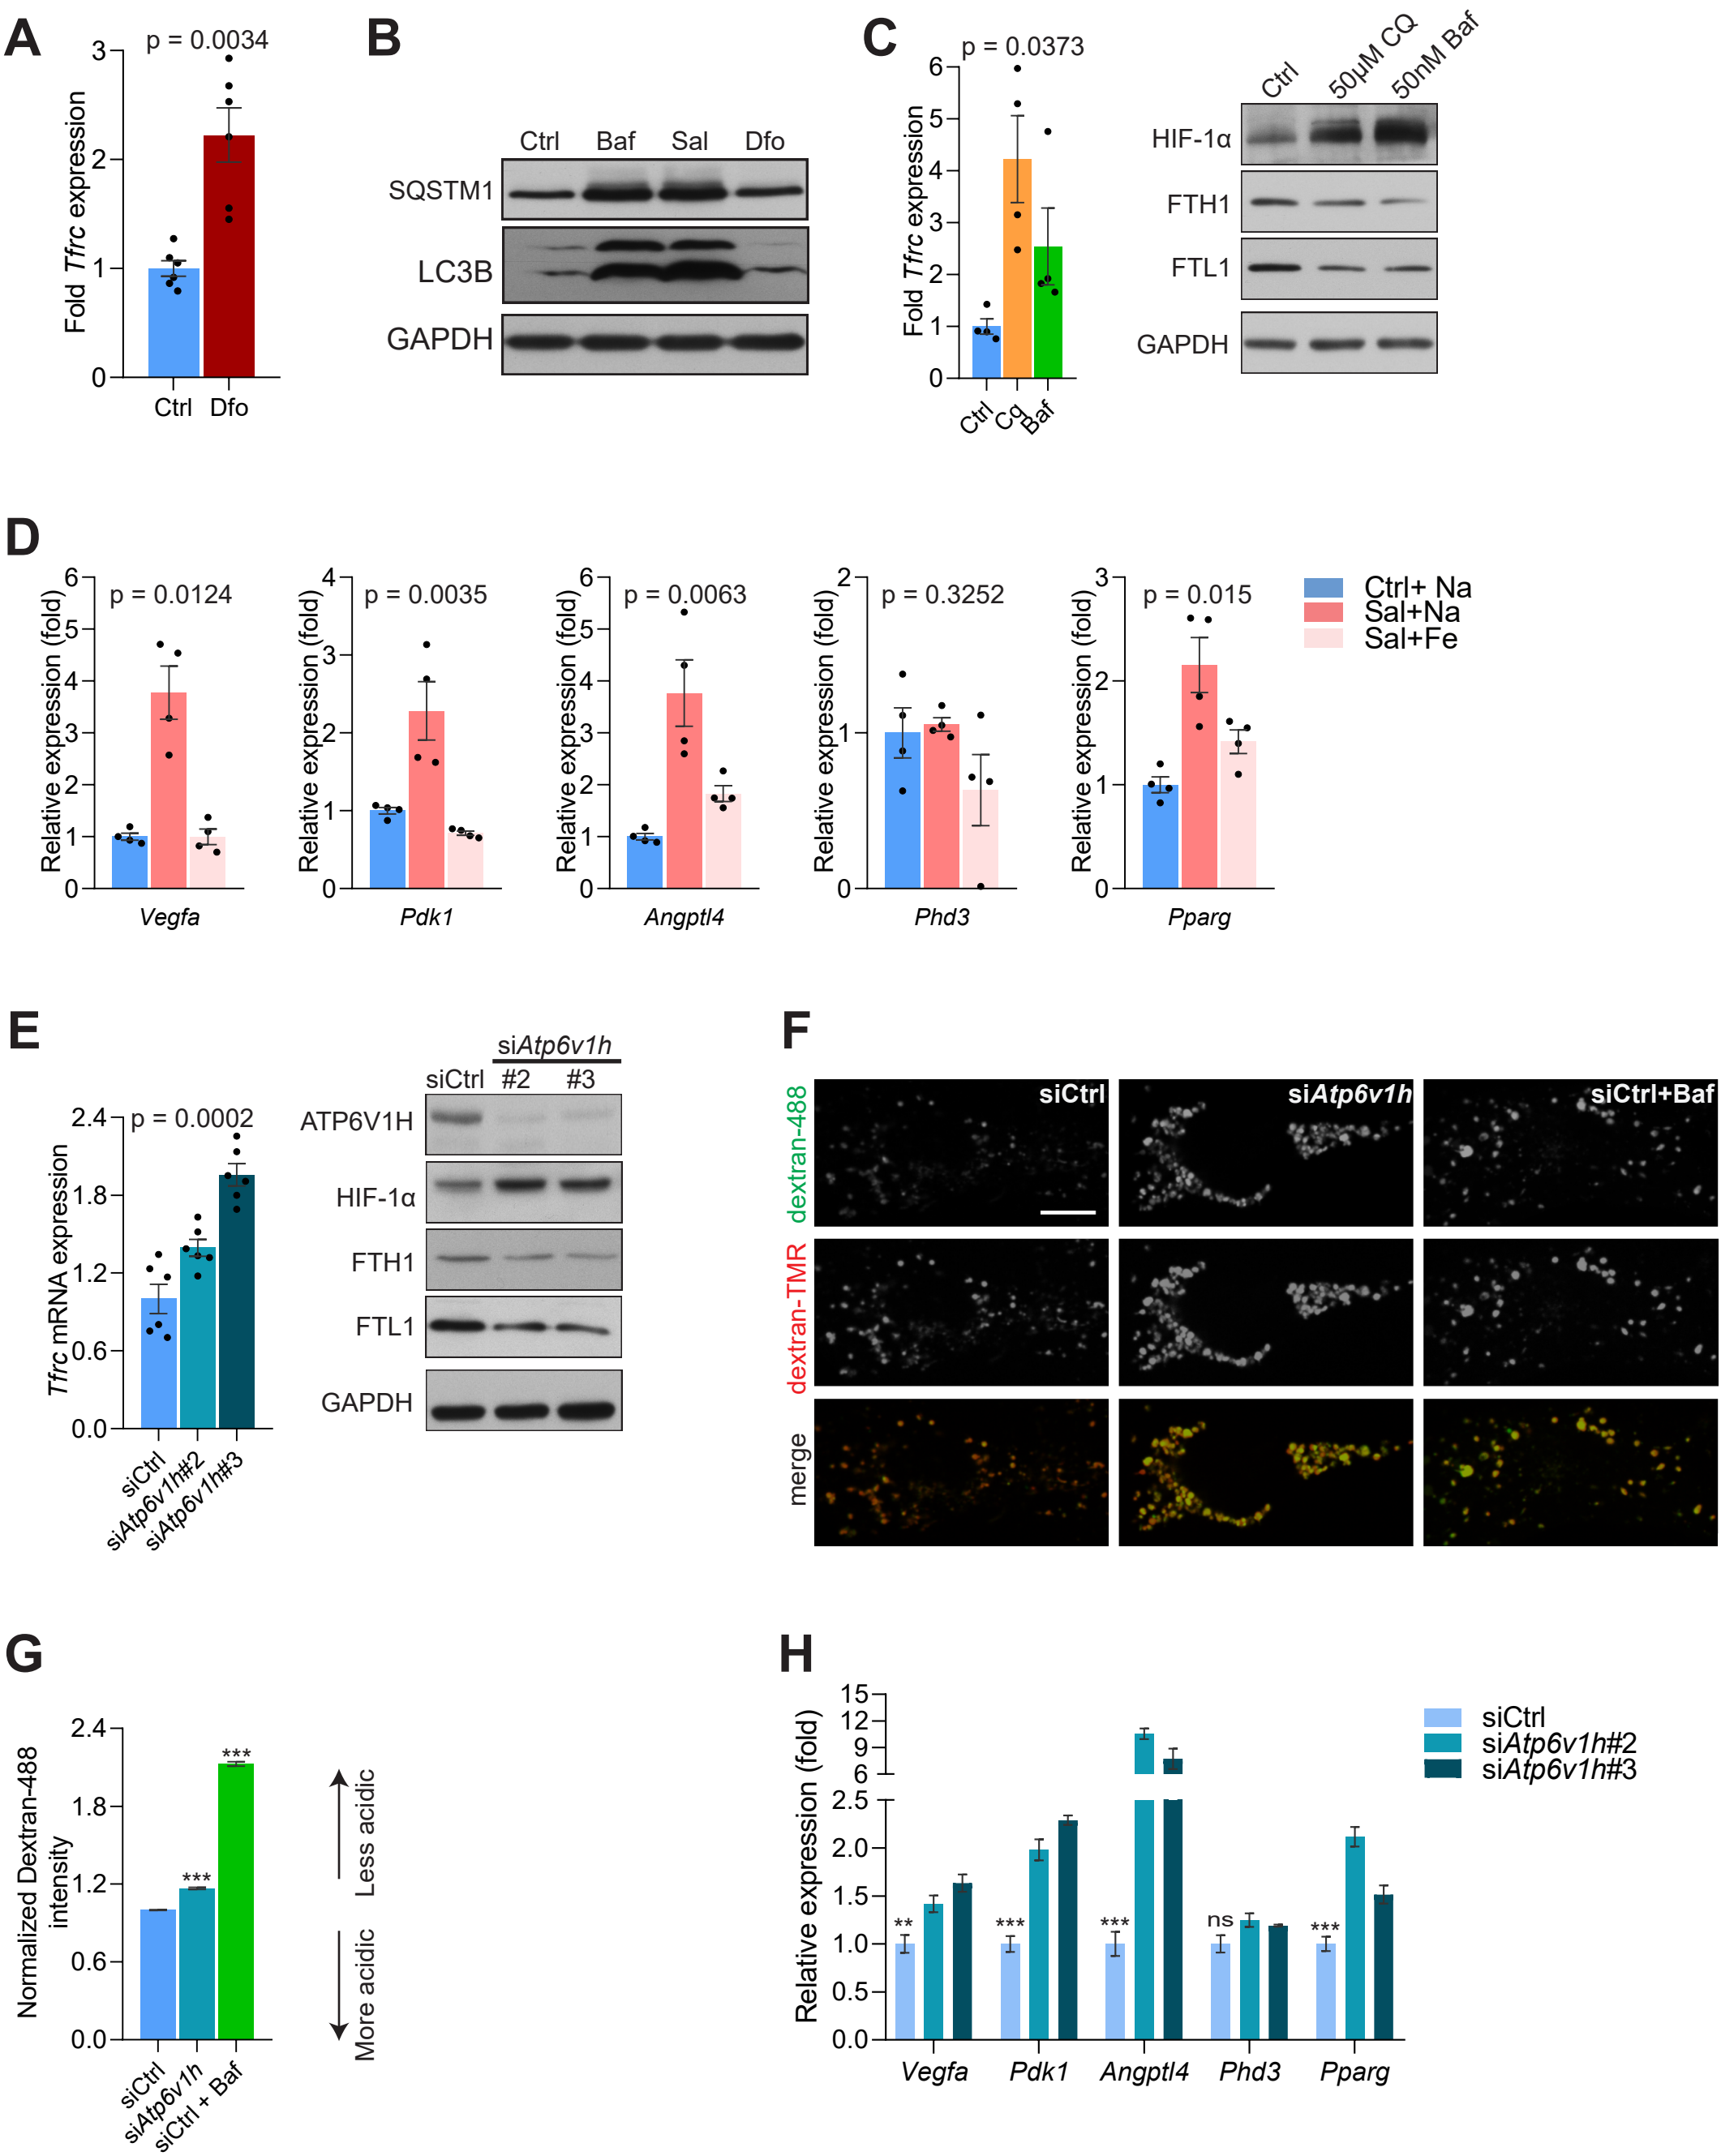

Supplement: supp [file elife-51031-supp-v1.zip]

Figure 4 - figure supplement 1

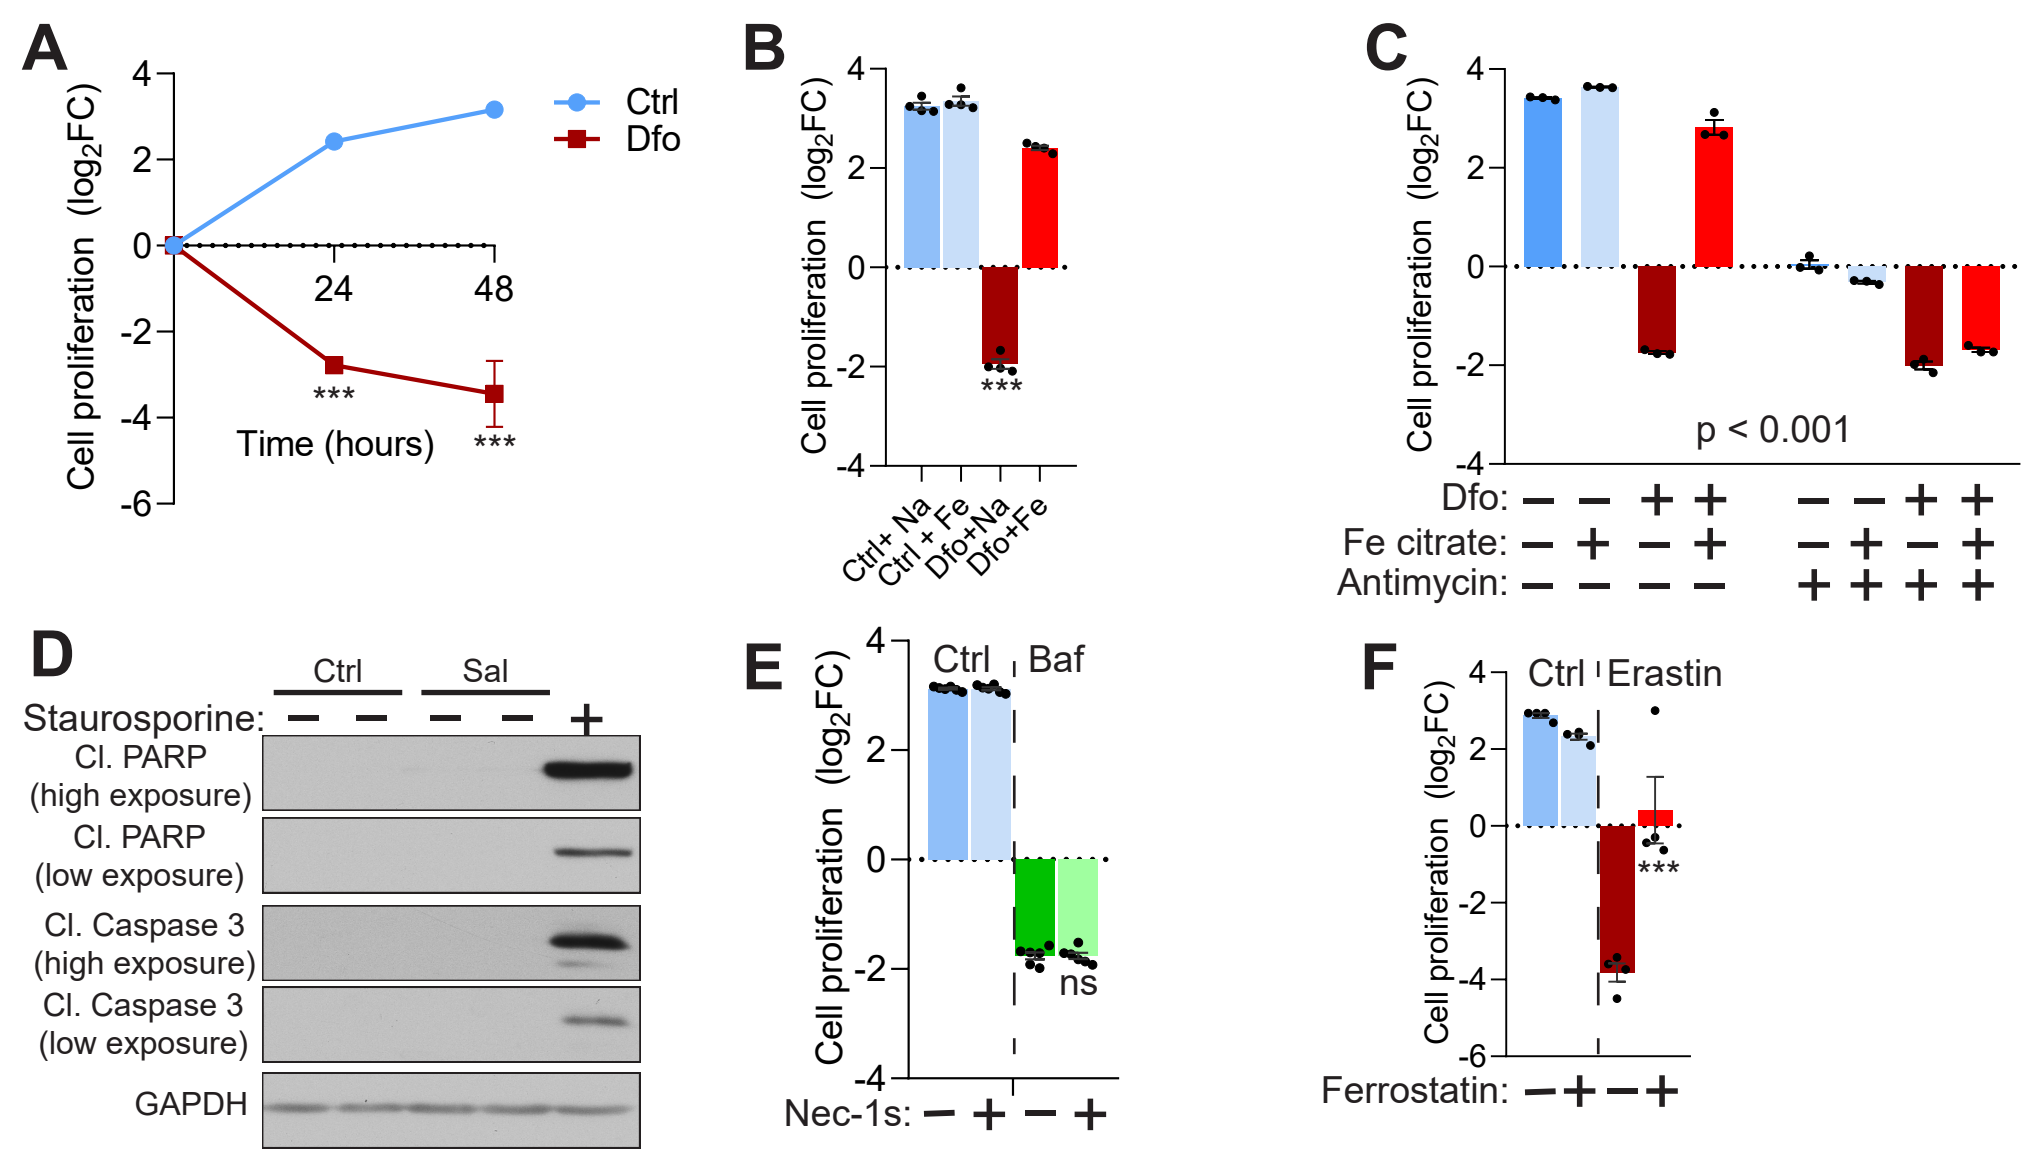

Supplement: supp [file elife-51031-supp-v1.zip]

# Figure 5 - figure supplement 1

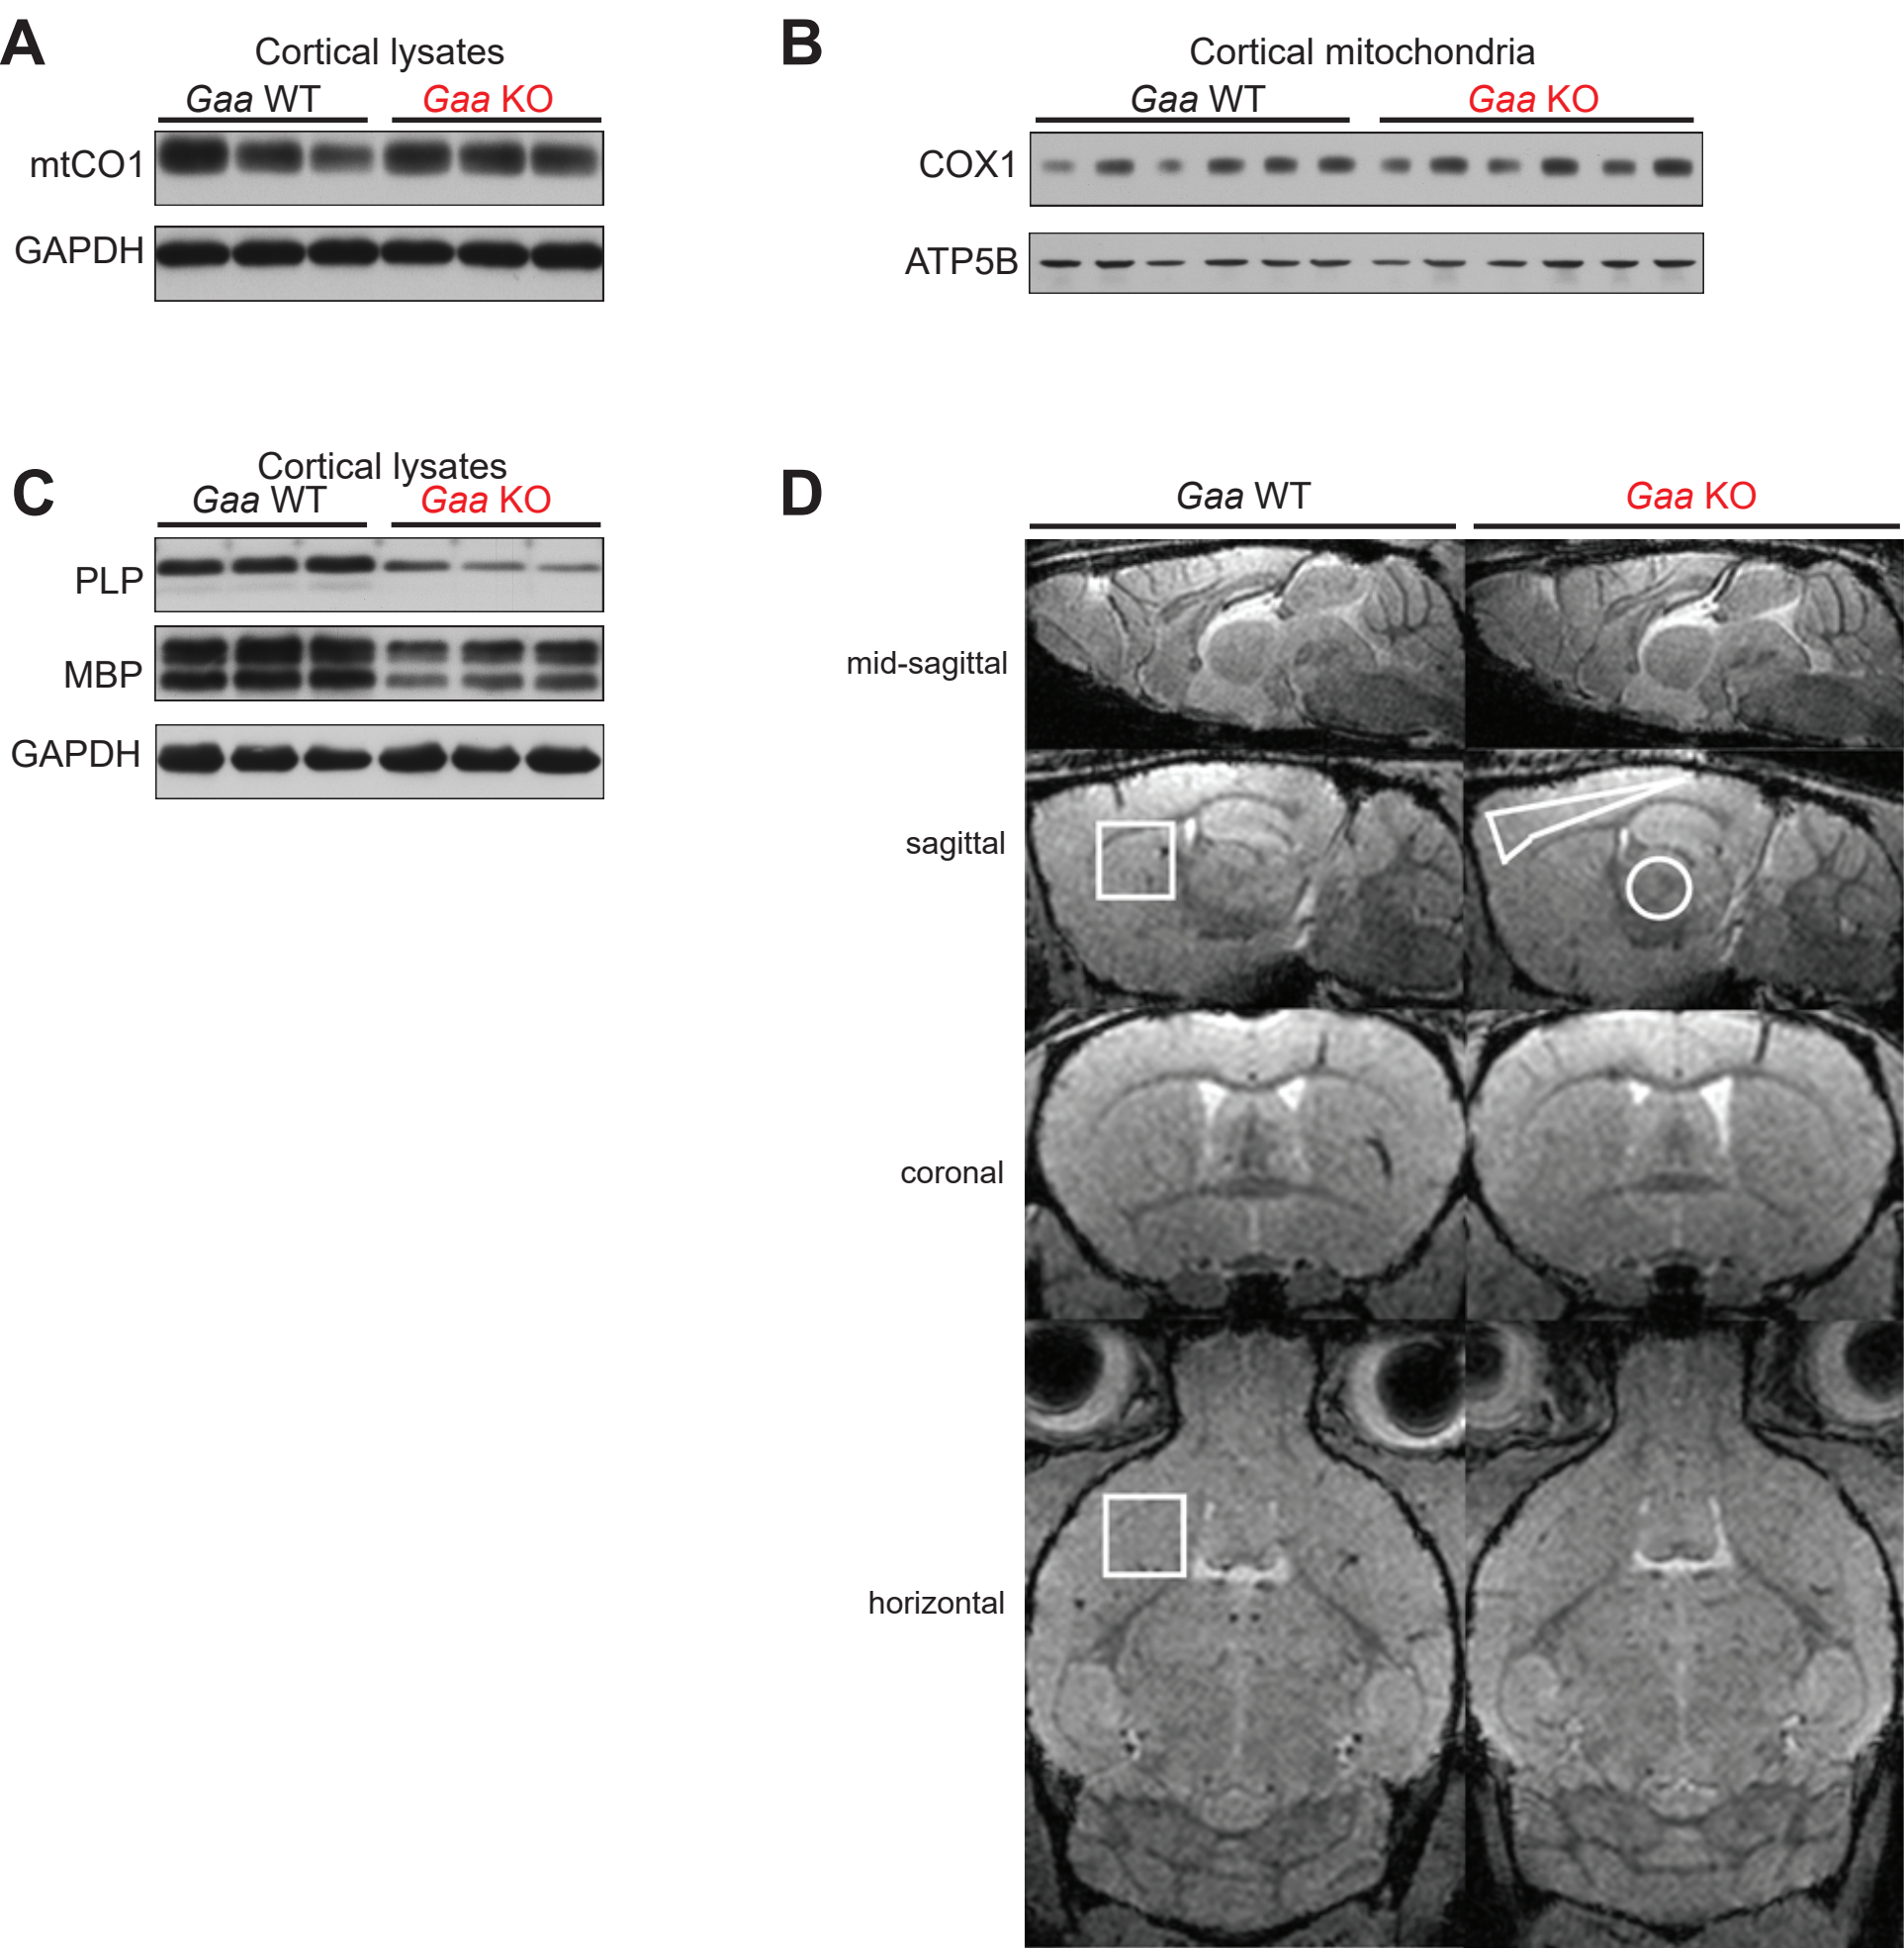

Supplement: supp [file elife-51031-supp-v1.zip]

Figure 3 - figure supplement 2

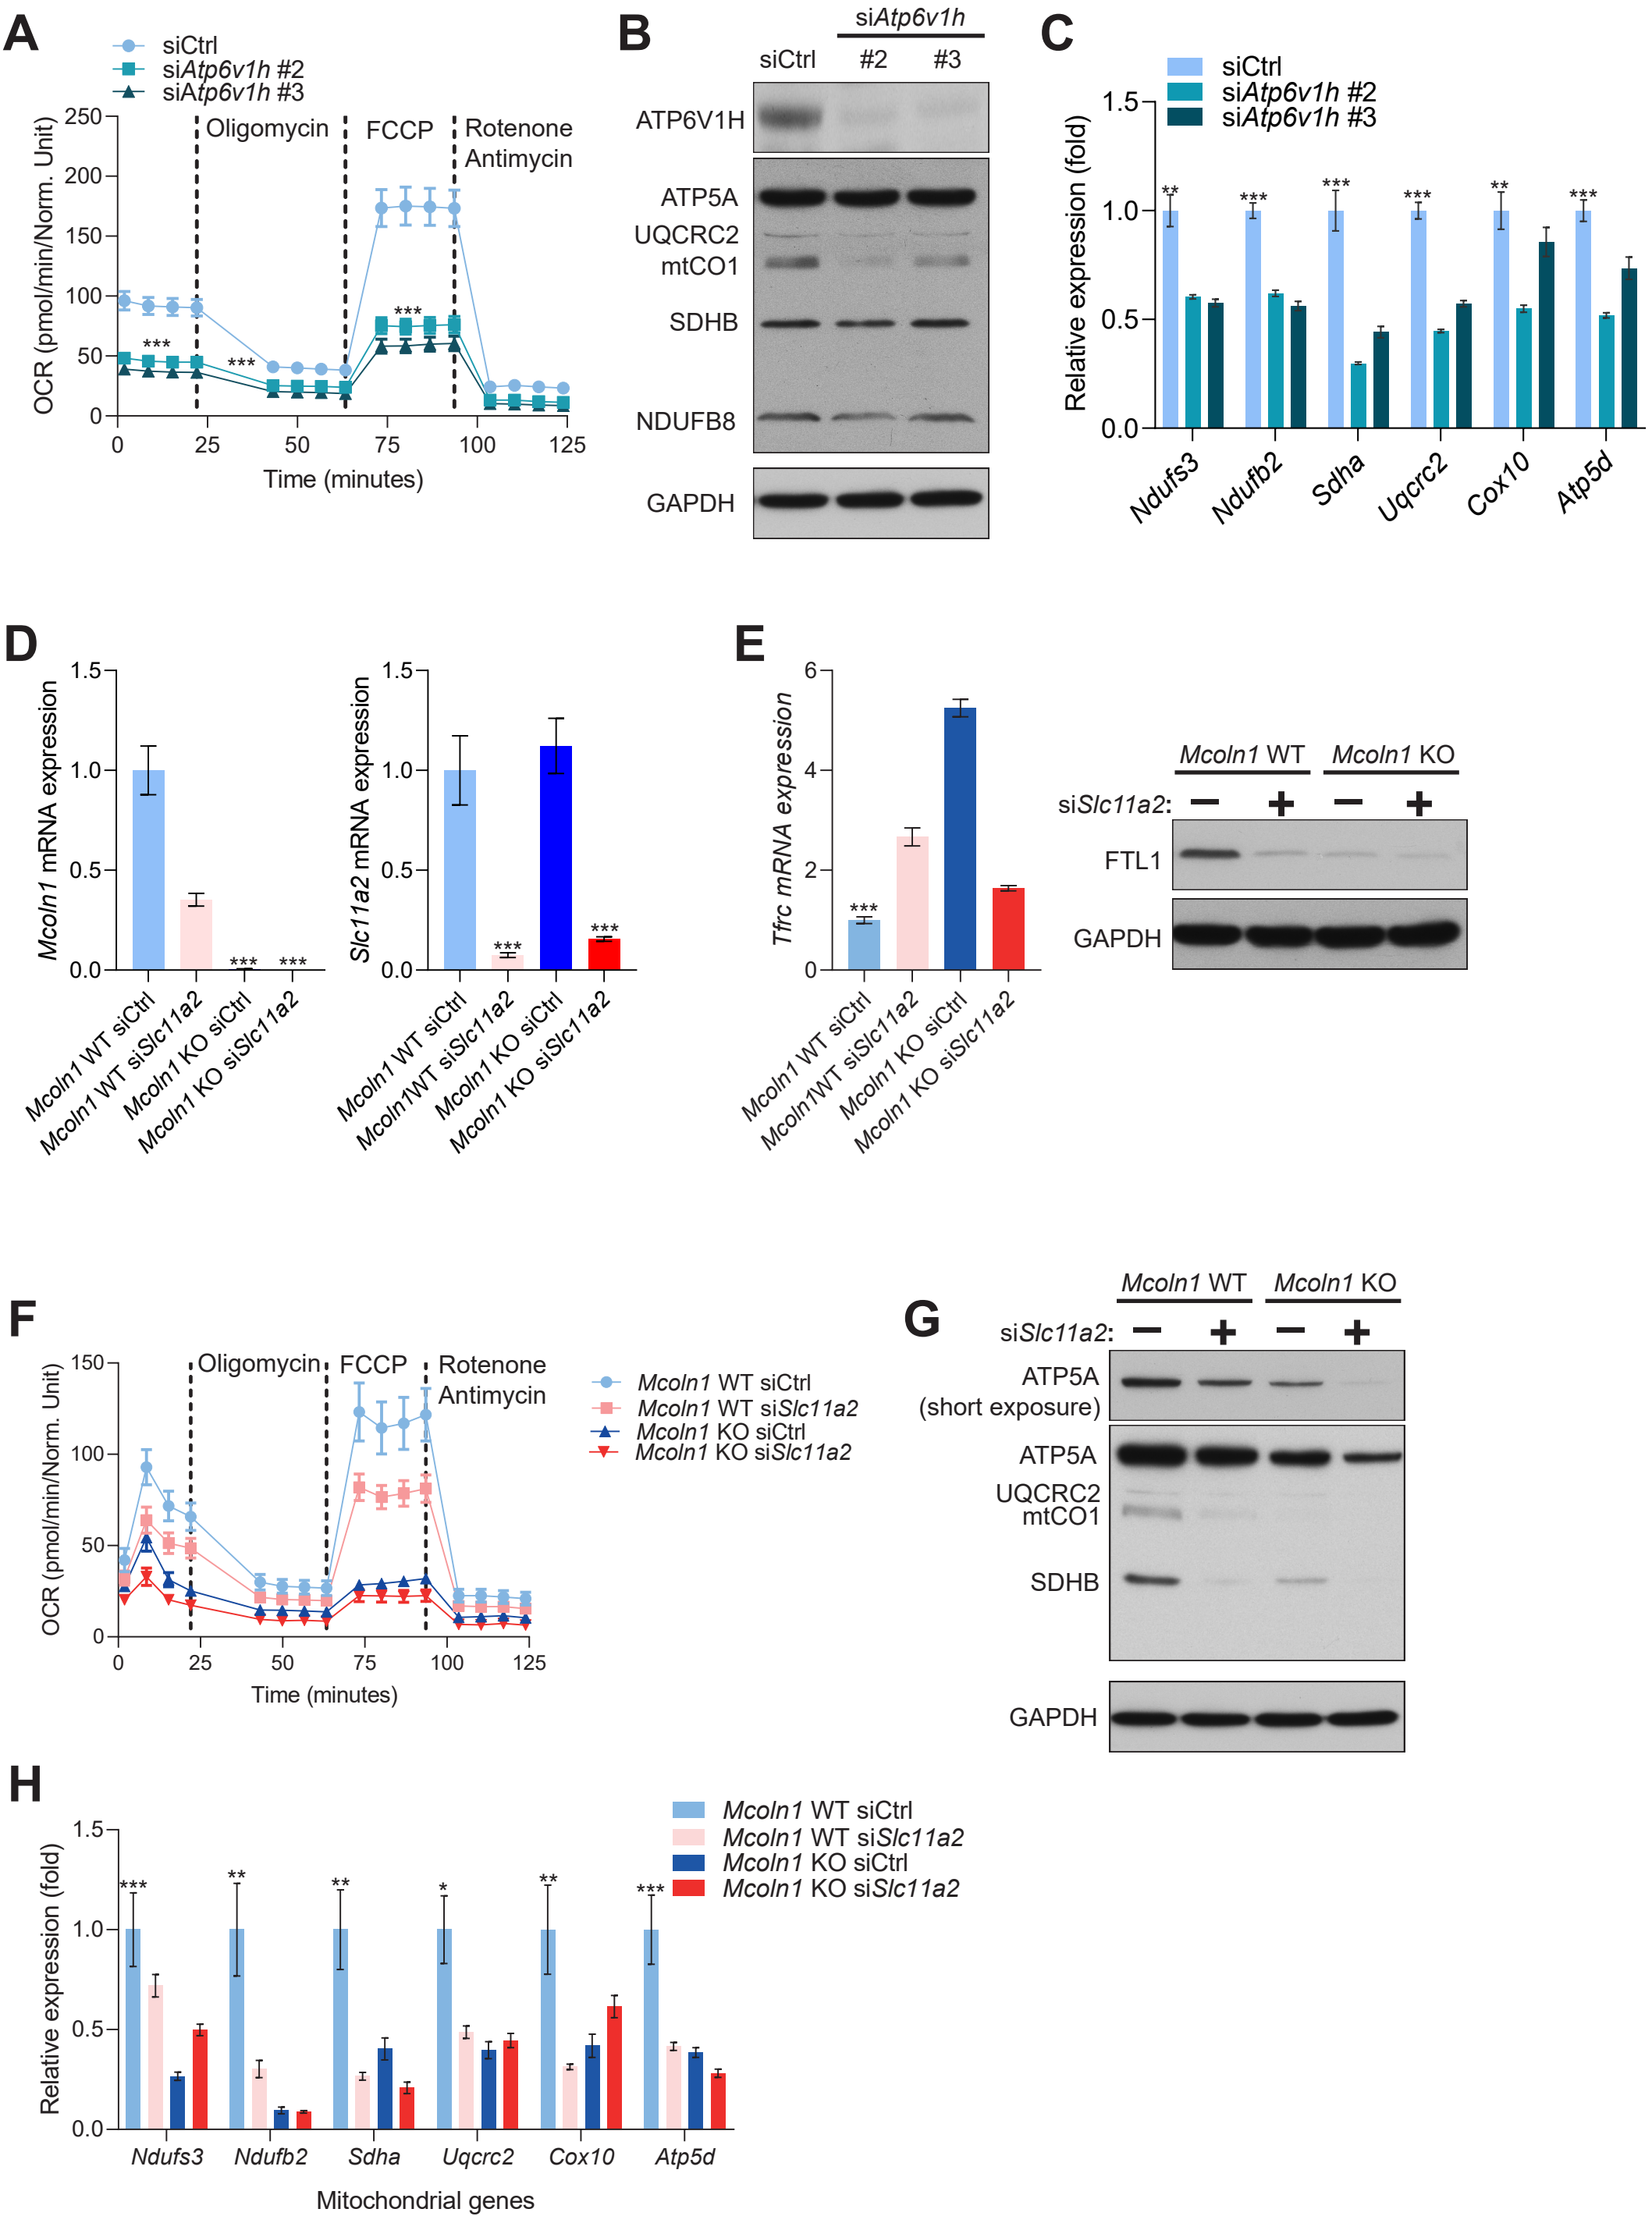

Supplement: supp [file elife-51031-supp-v1.zip]

Figure 3 - figure supplement 1

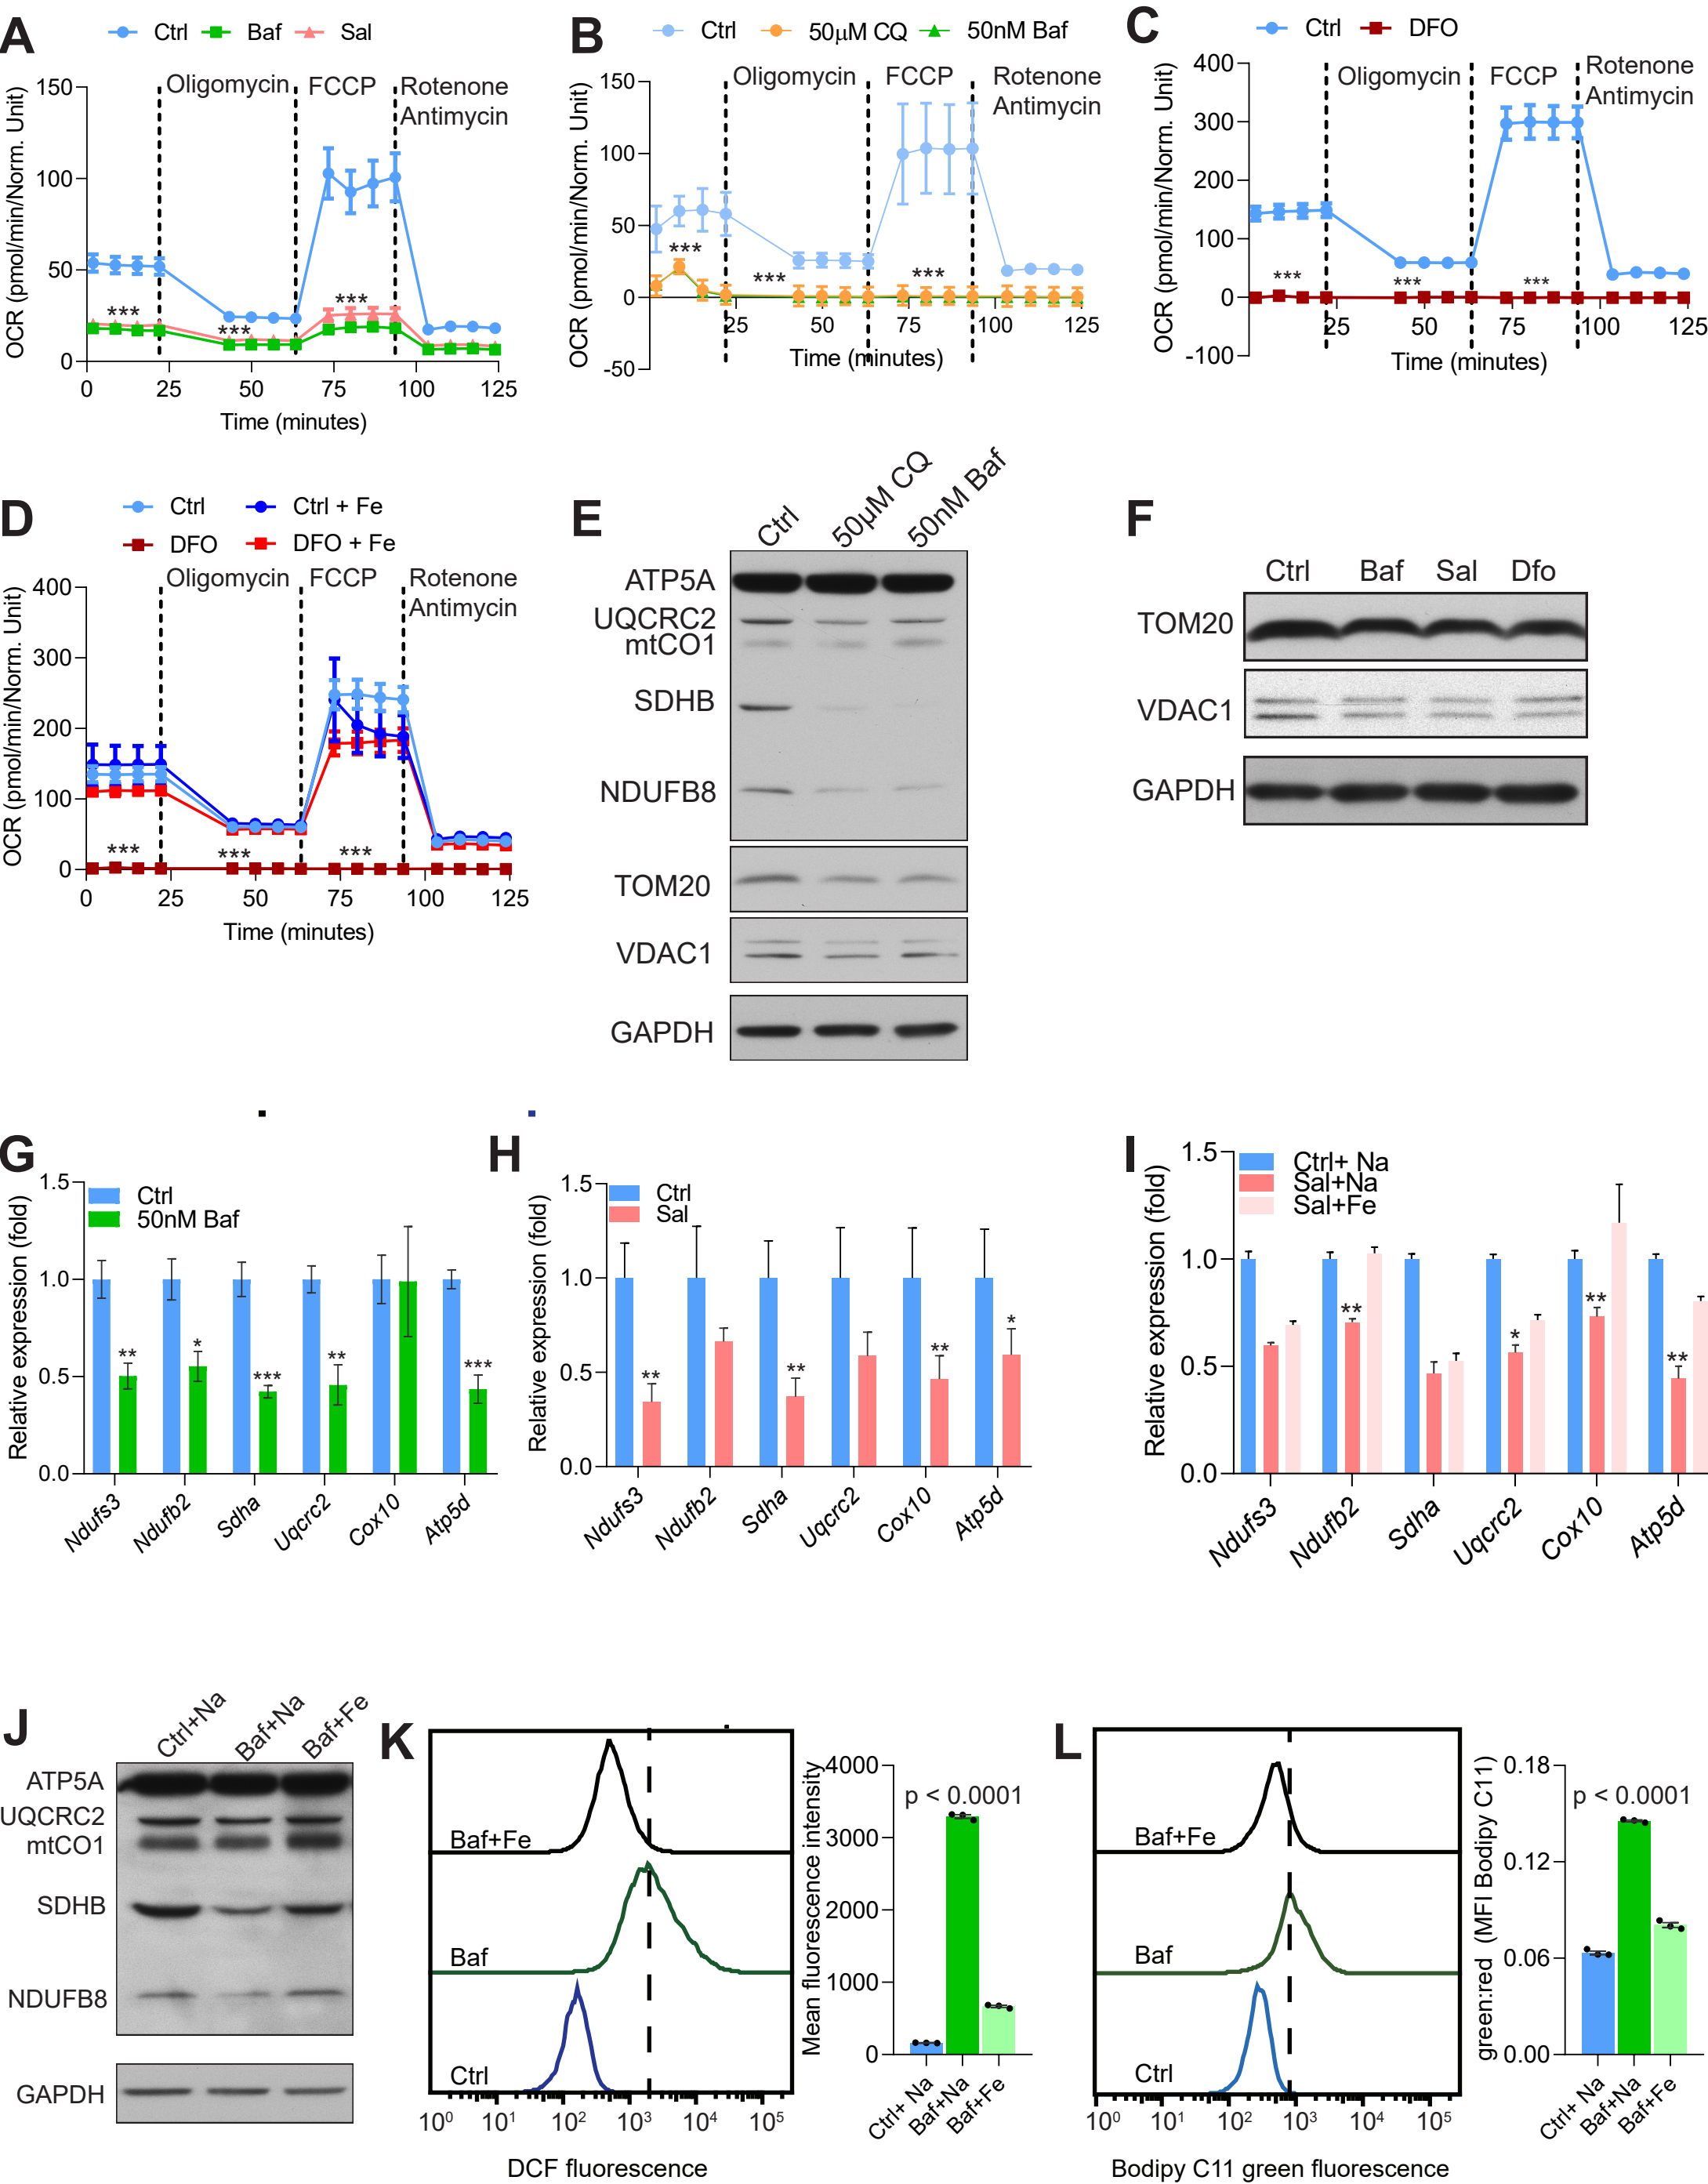

Supplement: supp [file elife-51031-supp-v1.zip]

Figure 7 - figure supplement 1

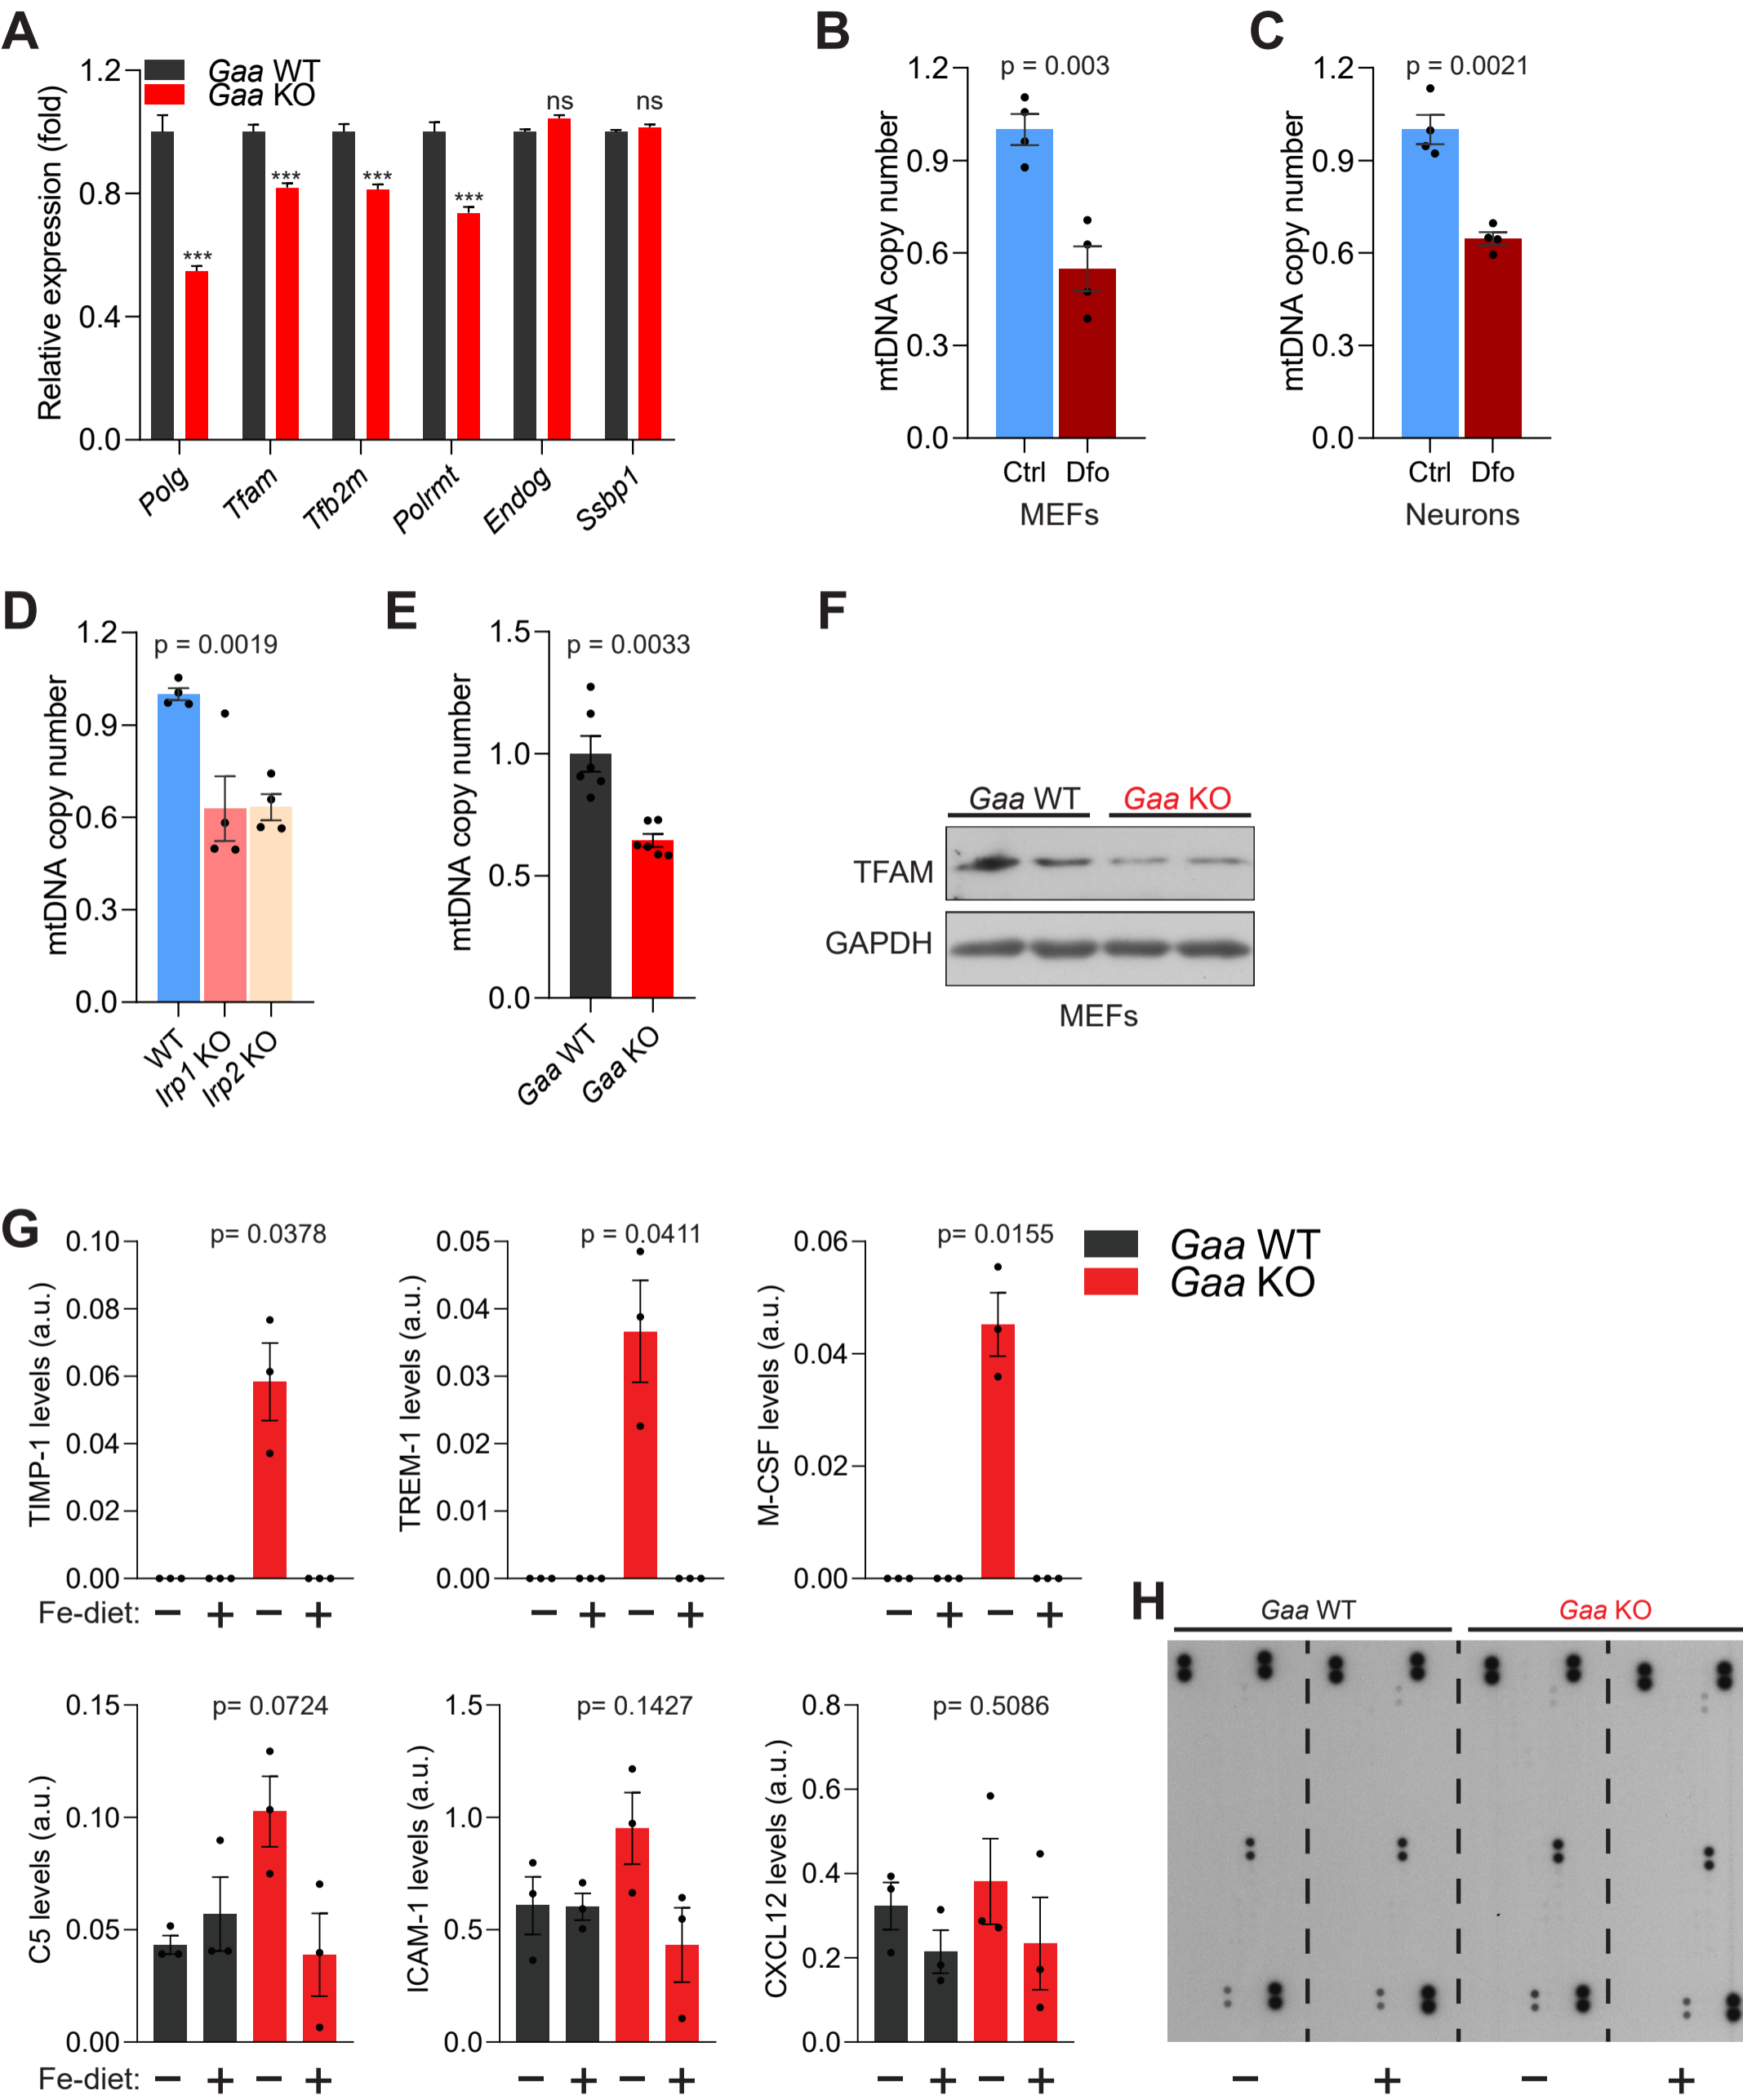

Supplement: supp [file elife-51031-supp-v1.zip › elife_poa_e51031_Figure_7_figure_supplement_1.pdf]
